# Supplementary material
Source: PubMed Central journal article supplement (PMC6542605)
Supplement: jciinsight-4-124213-s127.pdf [file jciinsight-4-124213-s127.pdf]

## Summary of Supplemental Figures and Tables

- 1) **Supplemental Figure 1.** Frequency of phenotypically defined endothelial cells is unchanged in aged mice.
- 2) **Supplemental Figure 2.** Aged LSKs have increased myeloid/megakaryocytic bias
- 3) **Supplemental Figure 3.** RBCs are decreased and Platelets are increased in peripheral blood of aged mice
- 4) **Supplemental Figure 4.** Aged BMME cultures have increased MSC populations.
- 5) **Supplemental Figure 5.** Aged BMME cells increase young LSK cell engraftment following competitive transplantation
- 6) **Supplemental Figure 6.** Flow cytometry gating strategy for sorting of young and aged murine M $\phi$ s
- 7) **Supplemental Figure 7.** Flow cytometry gating strategy for sorting of human M $\phi$ s
- 8) **Supplemental Figure 8.** Axl<sup>-/-</sup> LT-HSCs have increased cell engraftment following competitive transplantation
- 9) **Supplemental Figure 9.** Schematic representation of mechanisms by which age-dependent defects in marrow M $\phi$ s induce megakaryocytic bias in HSC.
- 10) **Table S1.** List of antibodies used in the flow cytometric and cell sorting analyses described
- 11) **Table S2.** List of cell populations analyzed and their respective immunophenotypes
- 12) **Table S3.** List of top GO-BP categories enriched for significantly upregulated genes from murine aged vs young marrow macrophages
- 13) **Table S4.** List of significant KEGG Pathways enriched for significantly upregulated genes from murine aged vs young marrow macrophages

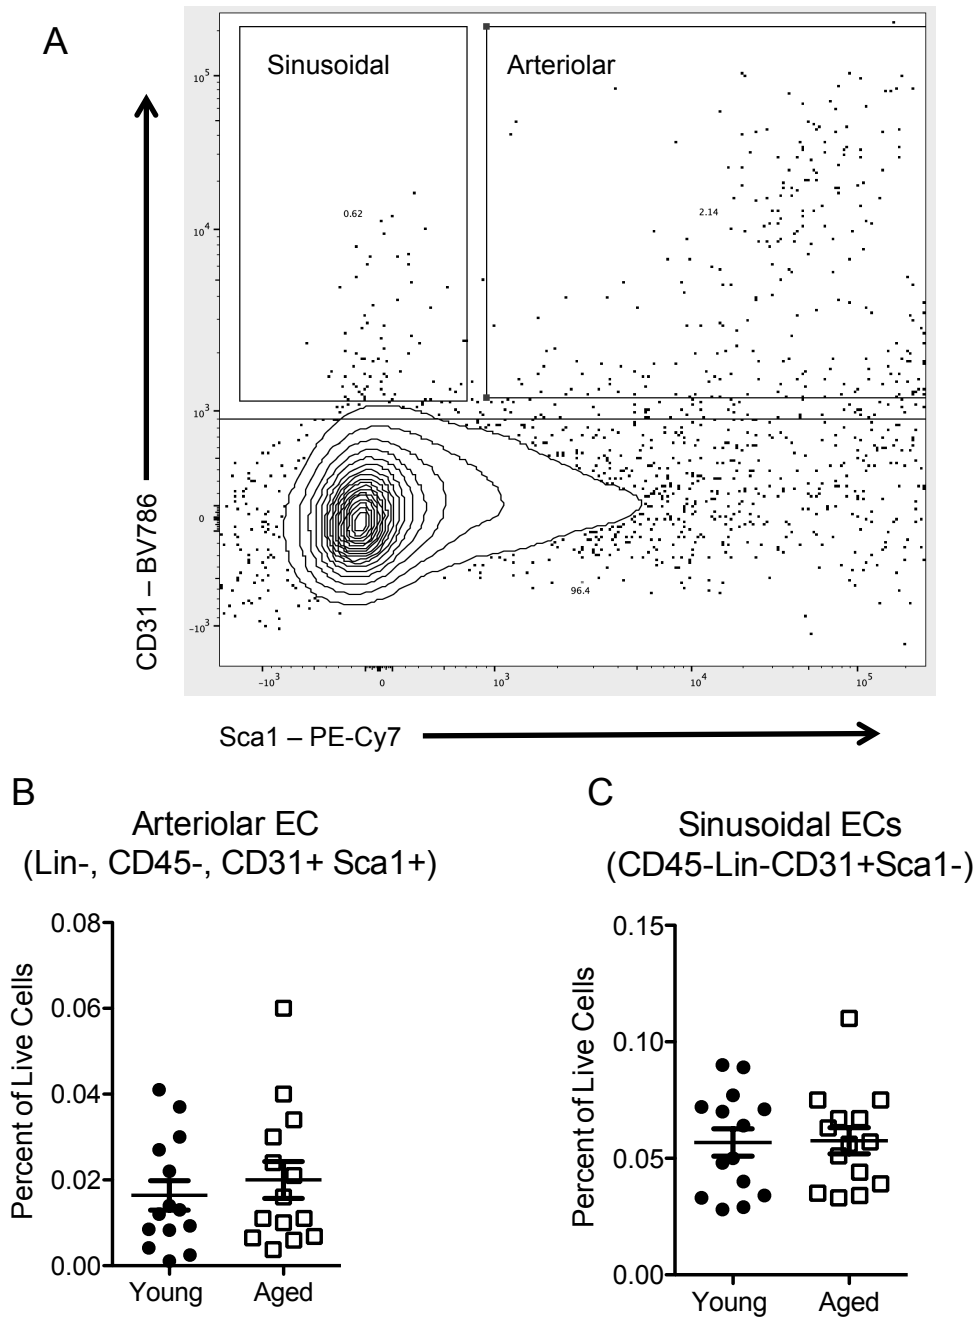

**Supplemental Figure 1. Frequency of phenotypically defined endothelial cells is unchanged in aged mice.** (A) Representative flow cytometry gating for Arteriolar (Lin<sup>-</sup>, CD45<sup>-</sup>, CD31<sup>+</sup>, Sca1<sup>+</sup>) and Sinusoidal (Lin<sup>-</sup>, CD45<sup>-</sup>, CD31<sup>+</sup>, Sca1<sup>-</sup>) Endothelial cells from the bone marrow of young and aged mice. (B, C) Quantification of Arteriolar (B) and Sinusoidal (C) endothelial cell populations.

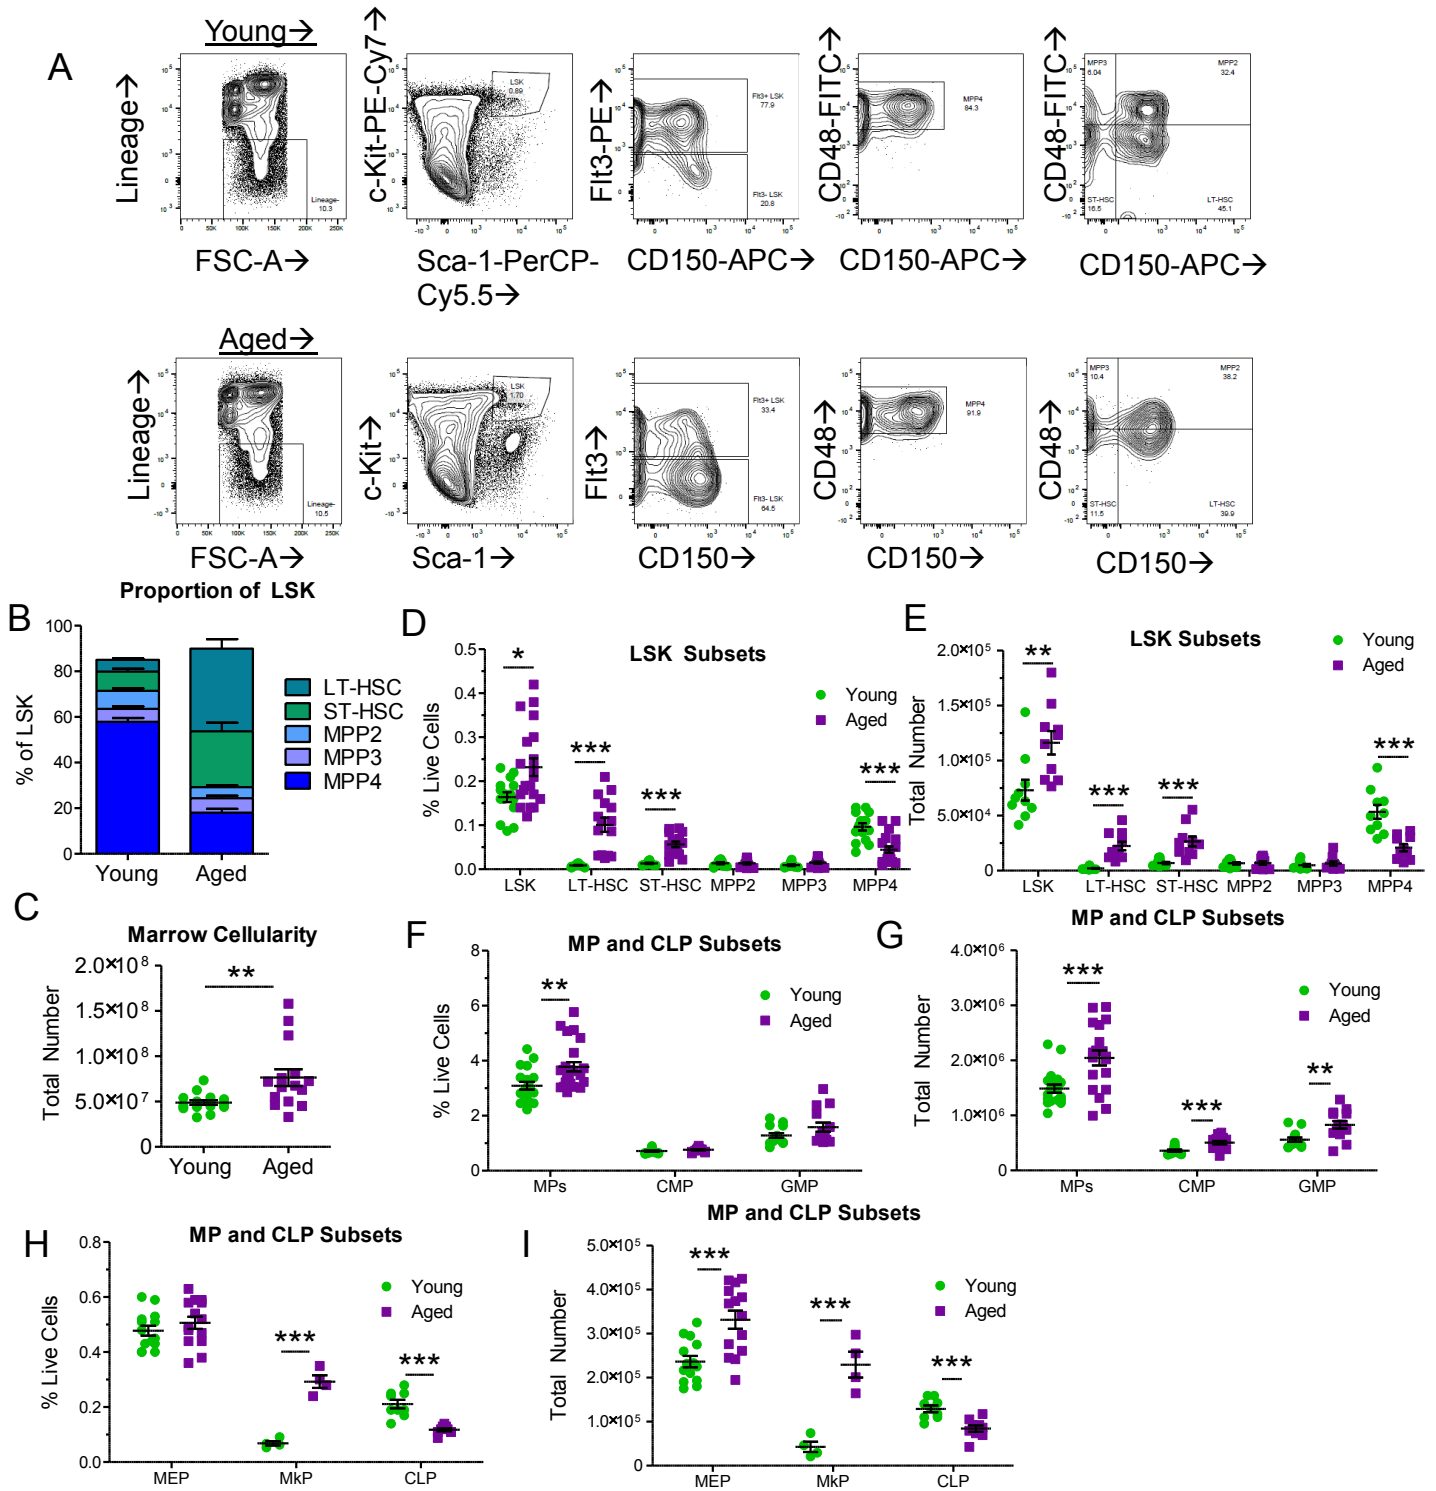

**Supplemental Figure 2. Aged LSKs have increased myeloid/megakaryocytic bias. (a,b)** Flow cytometry strategy (a-representative plots from young and aged mouse) and percent contribution (b) of lineage-Sca1<sup>+</sup> c-Kit<sup>+</sup> (LSK) subsets to HSPC pool of young and aged mice (N=10-15). (c) Marrow cellularity of young and aged mice (N=15). (d-i) Flow cytometry of percent live (d,f,h) and total number (e,g,i) of LSKs and subsets (d,e) and of myeloid (MP, CMP, GMP, MEP), lymphoid (CLP) and megakaryocytic (MkP) progenitors (f-i) in young and aged mice (N=10-15). Data represent mean±s.e.m. (*p*-values: two-tailed Student's *t*-test; \**p*<0.05; \*\**p*<0.01; \*\*\**p*<0.001).

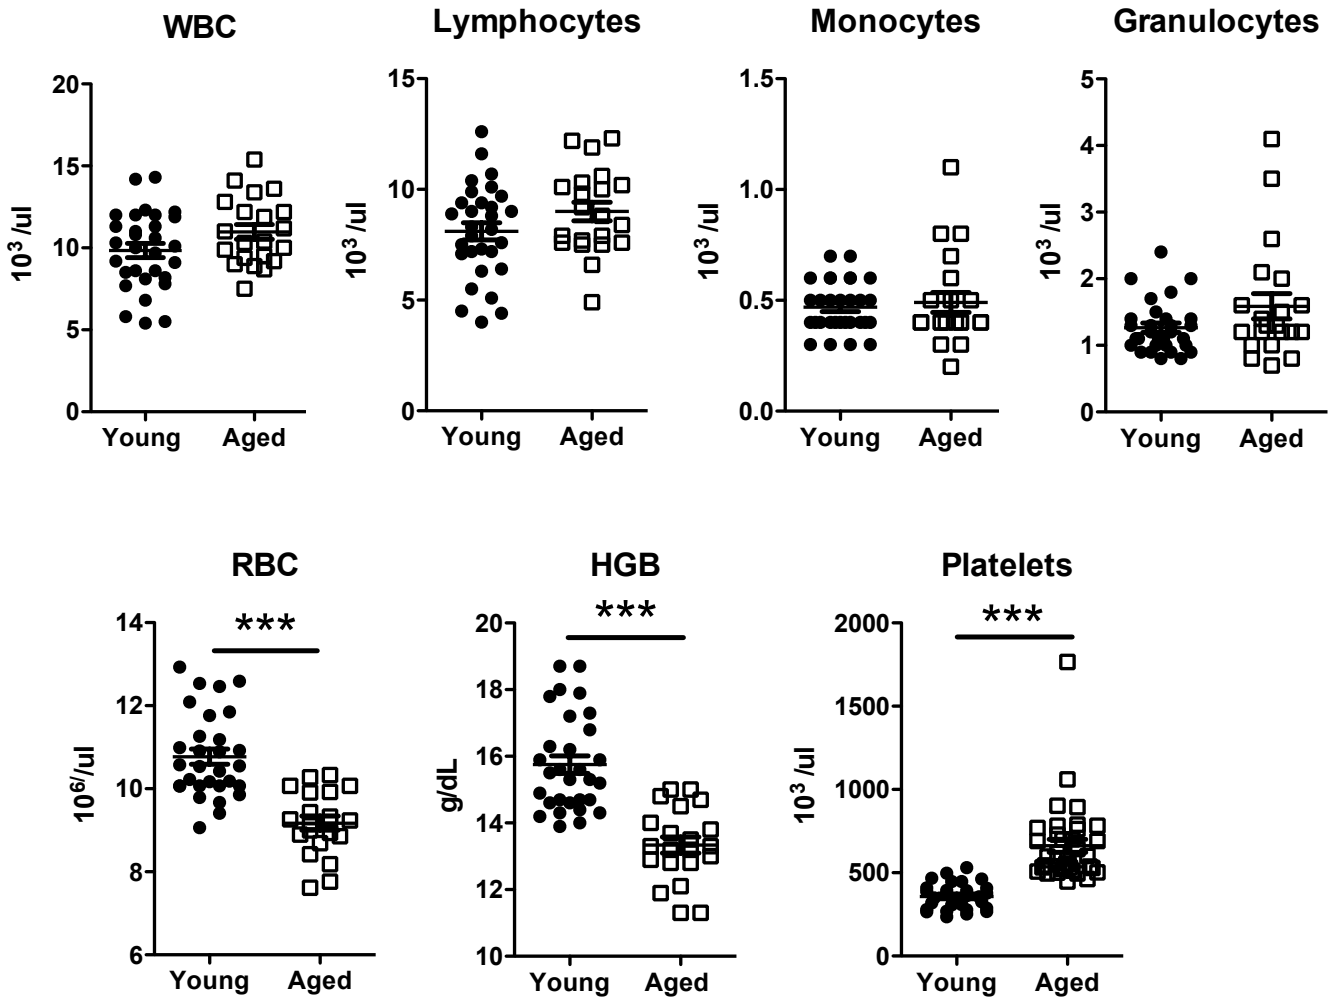

**Supplemental Figure 3. RBCs are decreased and Platelets are increased in peripheral blood of aged mice.** CBC analysis of peripheral blood demonstrates no change in the numbers of (A) WBC, (B) Lymphocytes, (C) Monocytes, (D) Granulocytes, a decrease in the number of (E) RBCs, and (F) HGB, and an increase in the number of (G) Platelets. N=25-30 mice/group. \*\*\*P<0.001.

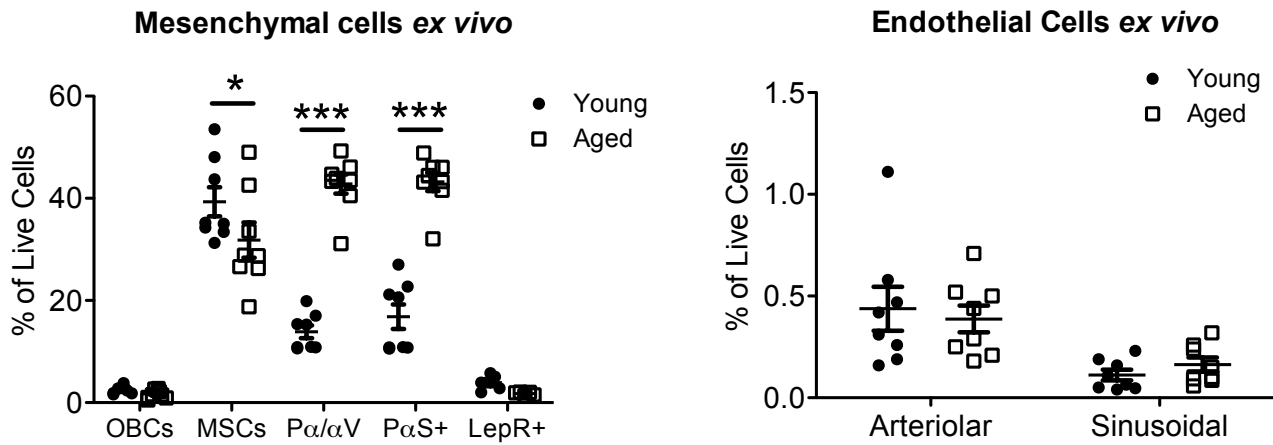

**Supplemental Figure 4. Increased MSC populations, and decreased osteoblastic cells in aged BMME tissue cultures.** Aged BMME cultures are enriched for MSC populations recapitulating what is seen in vivo in aged mice. Arteriolar and Sinusoidal endothelial cells make up less than 1% of total cells in BMME cultures and are not changed in aging. Data represent mean±s.e.m. ( $p$ -values: two-tailed Student's  $t$ -test; \* $p$ <0.05; \*\*\* $p$ <0.001).

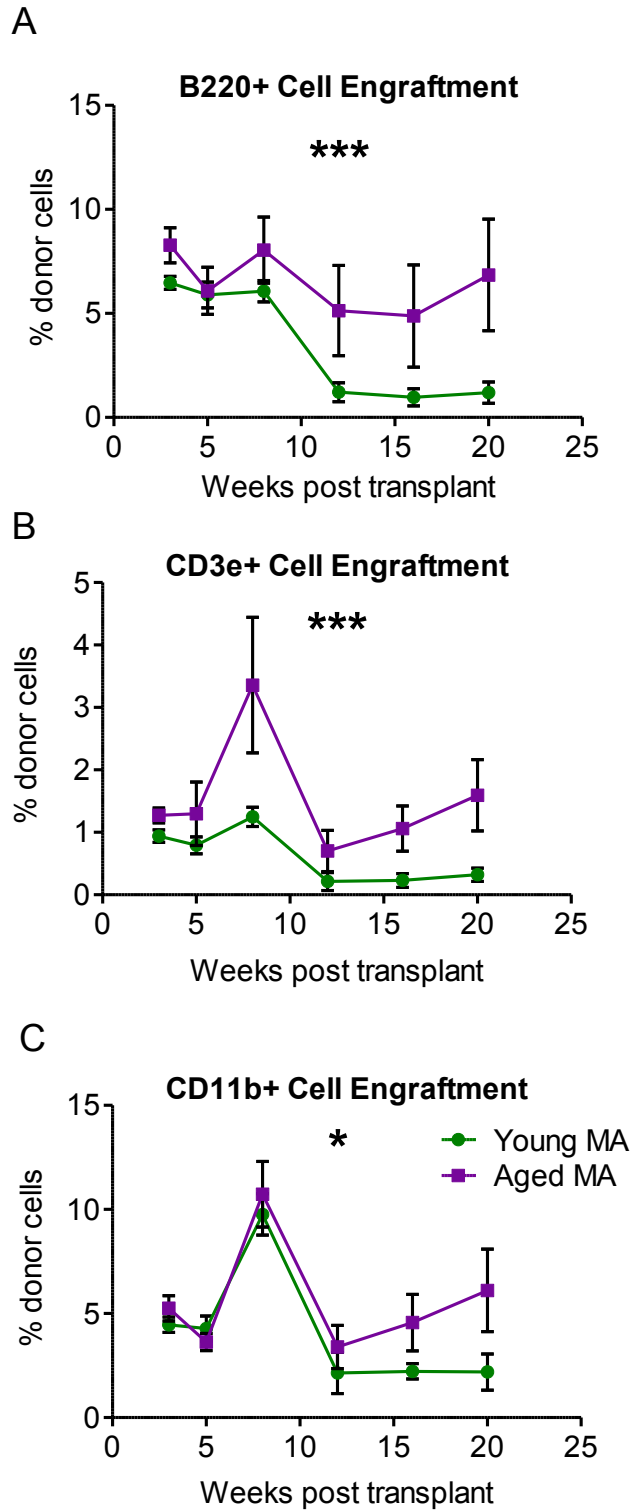

**Supplemental Figure 5. Aged BMME cells increase cell engraftment following competitive transplantation. (a-c)** Aged BMME cells demonstrate increase engraftment of B220+ (a), CD3e+ (b), and CD11b+ (c) cells compared to young BMME cells. (N= 5 Recipients/group). Data represent mean±s.e.m. (*p*-values: two-tailed Student's *t*-test; \**p*<0.05; \*\**p*<0.01; \*\*\**p*<0.001).

**A**

**Young murine bone marrow**

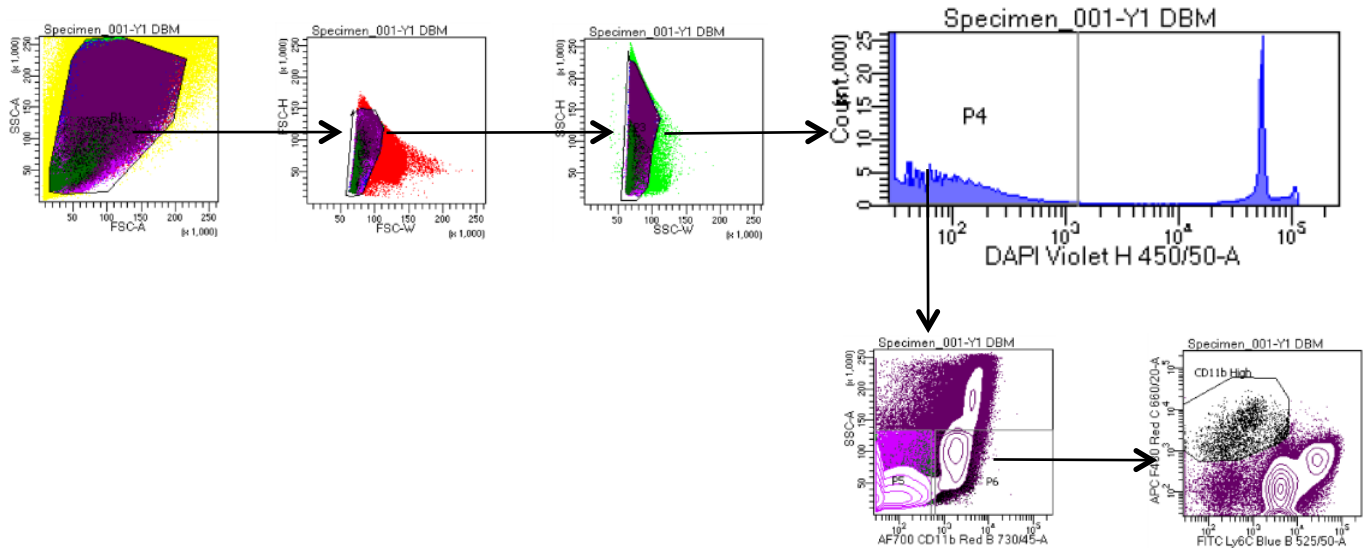

**B**

**Aged murine bone marrow**

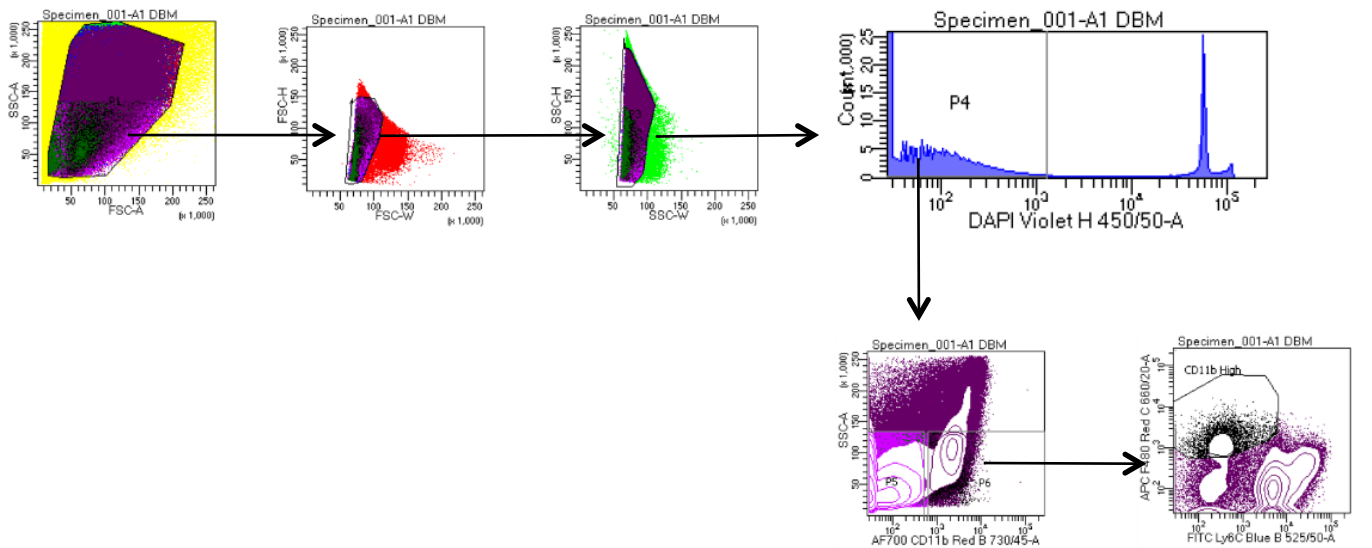

**Supplemental Figure 6. Flow cytometry gating strategy for young and aged murine Mφs.** Representative gating strategy used to analyze murine Mφs. F4/80<sup>+</sup>, Ly6C<sup>-</sup>, CD11b<sup>+</sup> Mφs were selected for analysis.

A

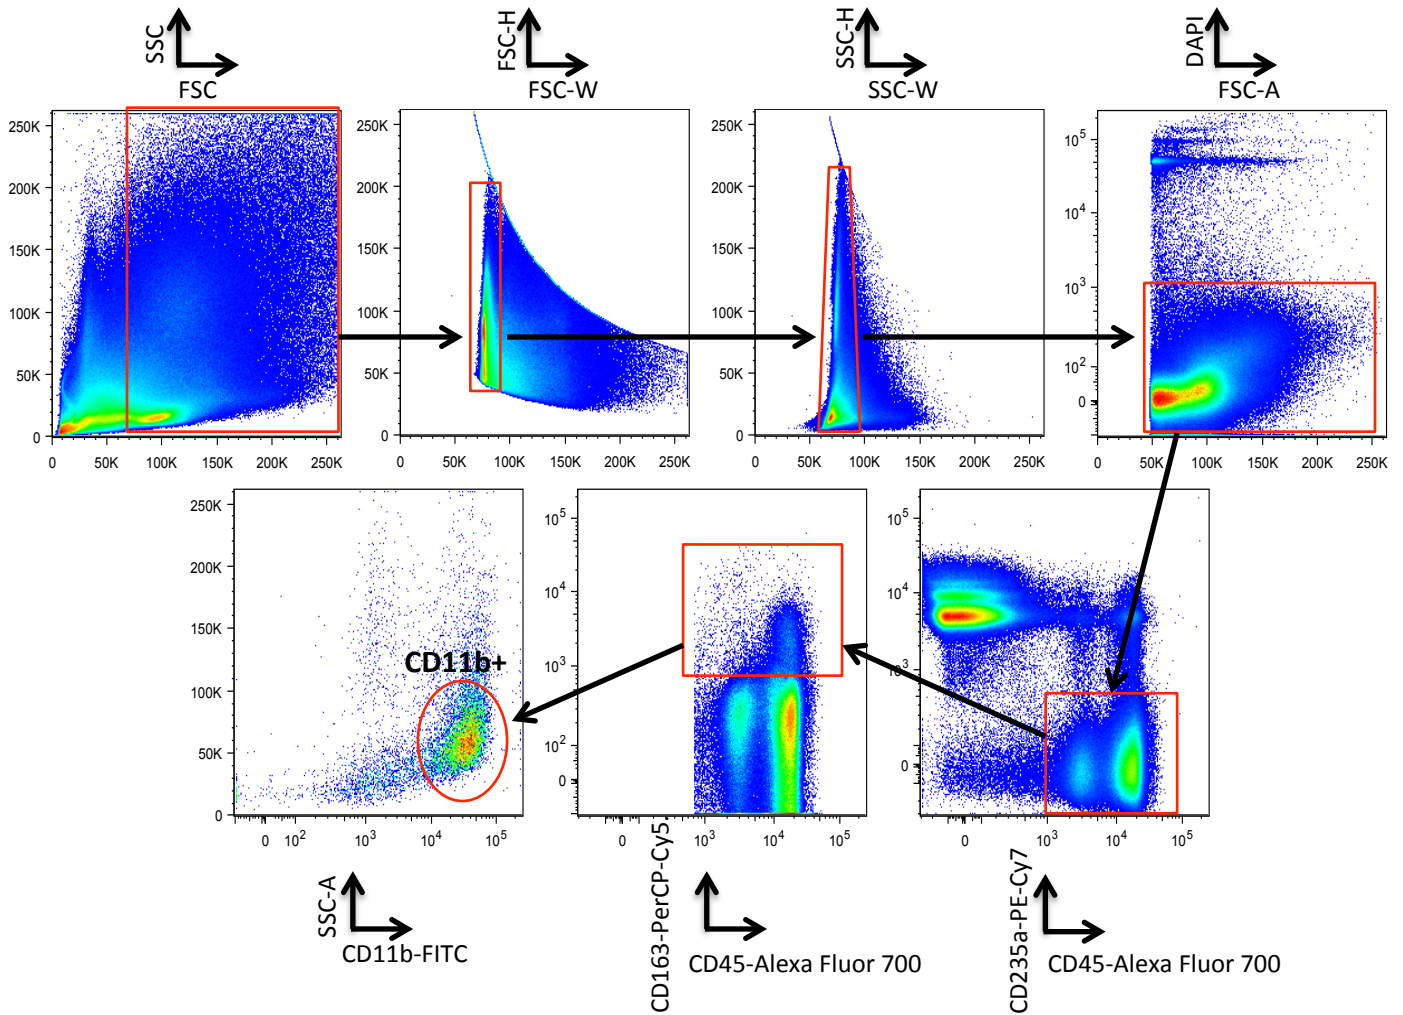

**Supplemental Figure 7. Flow cytometry gating strategy for human Mφs.** Representative gating strategy used to analyze Mφs in samples from human volunteers. CD45<sup>+</sup>, CD163<sup>+</sup> and CD45<sup>+</sup>, CD11b<sup>+</sup> Mφs were selected for analysis.



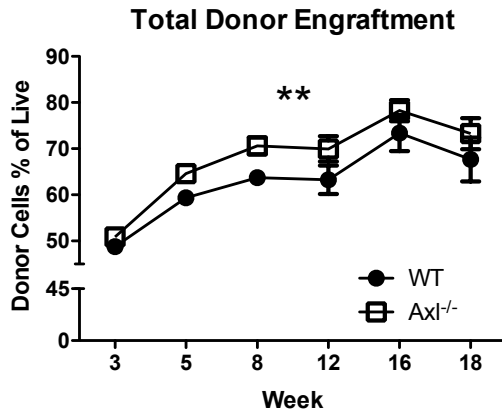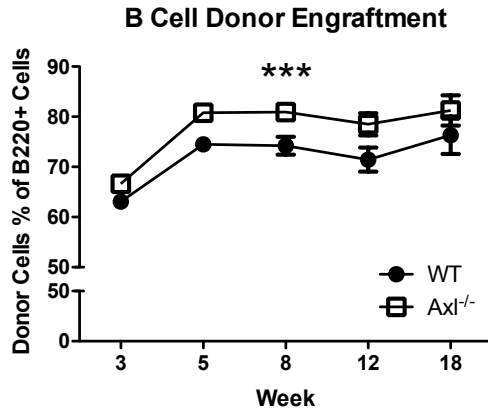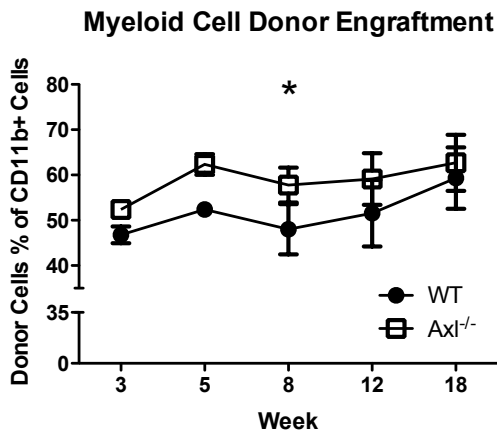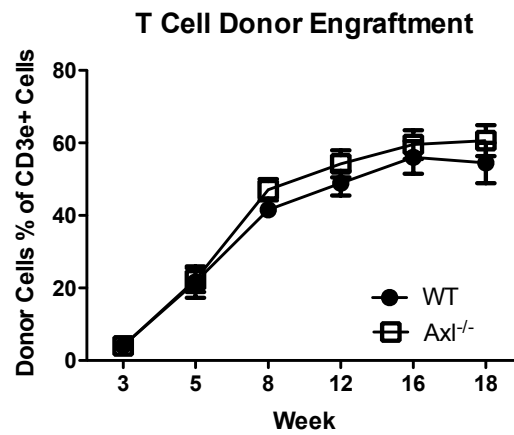

**Supplemental Figure 8. Axl<sup>-/-</sup> LT-HSCs have increased cell engraftment following competitive transplantation. (a-c) Axl<sup>-/-</sup> LT-HSCs demonstrate increase engraftment of B220+ (a), CD3e+ (b), and CD11b+ (c) cells compared to wildtype littermates. (N= 5 Recipients/group). Data represent mean±s.e.m. (*p*-values 2-way ANOVA; \**p*<0.05; \*\**p*<0.01; \*\*\**p*<0.001).**

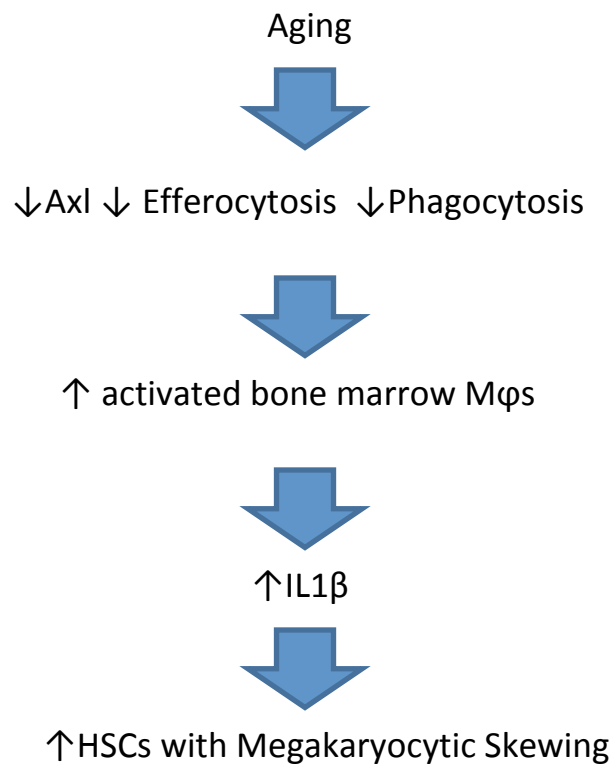

**Supplemental Figure 9.** Schematic representation of mechanisms by which age-dependent defects in marrow Mφs induce megakaryocytic bias in HSCs

Supplemental Table 1. Frisch, Hoffman *et al.*

| <b>Murine Hematopoietic Stem and Progenitor Cell Panel</b> |              |                                                       |                                                |
|------------------------------------------------------------|--------------|-------------------------------------------------------|------------------------------------------------|
| <b>Antibody</b>                                            | <b>Clone</b> | <b>Fluorophore</b>                                    | <b>Supplier and Cat #</b>                      |
| Lineage                                                    |              |                                                       |                                                |
| $\alpha$ -Ter119                                           | TER-119      | Biotin (primary)<br>PE-CF594-Streptavidin (secondary) | BD Biosciences; 560512                         |
| $\alpha$ -Gr1                                              | RB6-8C5      |                                                       | BD Biosciences; 561103                         |
| $\alpha$ -B220                                             | RA3-6B2      |                                                       | BD Biosciences; 561101                         |
| $\alpha$ -CD3e                                             | 145-2C11     |                                                       | BD Biosciences; 551163                         |
| $\alpha$ -cKit                                             | 2B8          | PE-Cy5                                                | eBioscience; 15-1171                           |
| $\alpha$ -Sca1                                             | D7           | PerCP-Cy5.5                                           | BD Biosciences; 558162                         |
| $\alpha$ -Flt3                                             | A2F10        | PE                                                    | eBioscience; 12-1351                           |
| $\alpha$ -CD48                                             | HM48-1       | FITC                                                  | eBioscience; 11-0481                           |
| $\alpha$ -CD150                                            | 9D1          | APC                                                   | eBioscience; 17-1501                           |
| $\alpha$ -CD34                                             | RAM34        | Alexa Fluor 700                                       | BD Biosciences; 560518                         |
| $\alpha$ -CD41                                             | MWRReg30     | BUV-395                                               | BD Biosciences; 565980                         |
| $\alpha$ -Fc $\gamma$ R                                    | 2.4G2        | APC-Cy7                                               | BD Biosciences; 560541                         |
| $\alpha$ -CD127                                            | A7R34        | PE-Cy7                                                | Biolegend; 135013                              |
| <b>Murine Stromal Cell Panel</b>                           |              |                                                       |                                                |
| <b>Antibody</b>                                            | <b>Clone</b> | <b>Fluorophore</b>                                    | <b>Supplier and Cat #</b>                      |
| Lineage                                                    |              |                                                       |                                                |
| $\alpha$ -Ter119                                           | TER-119      | PerCP-Cy5.5                                           | BD Biosciences; 560512                         |
| $\alpha$ -Gr1                                              | RB6-8C5      |                                                       | BD Biosciences; 561103                         |
| $\alpha$ -B220                                             | RA3-6B2      |                                                       | BD Biosciences; 561101                         |
| $\alpha$ -CD3e                                             | 145-2C11     |                                                       | BD Biosciences; 551163                         |
| $\alpha$ -Sca1                                             | D7           | PE-Cy7                                                | BD Biosciences; 558162                         |
| $\alpha$ -CD105                                            | MJ7/18       | PE-CF594                                              | BD Biosciences; 562762                         |
| $\alpha$ -CD51                                             | RMV-7<br>390 | PE                                                    | BD Biosciences; 551187                         |
| $\alpha$ -CD31                                             |              | FITC                                                  | BD Biosciences; 558738                         |
| $\alpha$ -CD45                                             | 30-F11       | APC-Cy7                                               | BD Biosciences; 557659                         |
| $\alpha$ -CD11b                                            | M1/70        | Alexa Fluor 700                                       | BD Biosciences; 557960                         |
| $\alpha$ -PDGFR $\alpha$                                   |              | APC                                                   | BD Biosciences; 562777                         |
| $\alpha$ -LepR                                             | APA5         | Biotin (primary)<br>BUV395-Streptavidin (secondary)   | R&D Systems; BAF497/<br>BD Biosciences; 564176 |
| <b>Murine Macrophage Cell Panel (<i>in vitro</i>)</b>      |              |                                                       |                                                |
| <b>Antibody</b>                                            | <b>Clone</b> | <b>Fluorophore</b>                                    | <b>Supplier and Cat #</b>                      |
| $\alpha$ -CD86                                             | GL-1         | PE-Cy7                                                | BD Biosciences; 560582                         |
| $\alpha$ -MHCII                                            | M5/114.15.2  | PerCP-Cy5.5                                           | BD Biosciences; 562363                         |
| $\alpha$ -F4/80                                            | BM8          | FITC                                                  | eBioscience; 11-481                            |
| $\alpha$ -CD45                                             | 30-F11       | APC-Cy7                                               | BD Biosciences; 557659                         |
| $\alpha$ -CD11b                                            | M1/70        | Alexa Fluor 700                                       | BD Biosciences; 557960                         |

Supplemental Table 1 (continued). Frisch, Hoffman *et al.*

| <b>Murine Macrophage Cell Sorting</b>                |              |                    |                           |
|------------------------------------------------------|--------------|--------------------|---------------------------|
| <b>Antibody</b>                                      | <b>Clone</b> | <b>Fluorophore</b> | <b>Supplier and Cat #</b> |
| $\alpha$ -CD45                                       | 30-F11       | APC-Cy7            | BD Biosciences; 557659    |
| $\alpha$ -F4/80                                      | BM8          | FITC               | eBioscience; 11-481       |
| <b>Murine Macrophage Cell Panel (<i>in vivo</i>)</b> |              |                    |                           |
| <b>Antibody</b>                                      | <b>Clone</b> | <b>Fluorophore</b> | <b>Supplier and Cat #</b> |
| $\alpha$ -Ly6C                                       | HK1.4        | Pacific Blue       | BioLegend; 128014         |
| $\alpha$ -F4/80                                      | Cl:A3-1      | APC-Cy7            | BioLegend; 122614         |
| $\alpha$ -CD11b                                      | M1/70        | PE                 | BioLegend; 101216         |
| $\alpha$ -MHC-II                                     | AF6-120.1    | PE-Cy7             | BioLegend; 116419         |
| <b>Murine Senescent Neutrophil Panel</b>             |              |                    |                           |
| <b>Antibody</b>                                      | <b>Clone</b> | <b>Fluorophore</b> | <b>Supplier and Cat #</b> |
| $\alpha$ -Ly6G                                       | IA8          | BUV-395            | BD Biosciences; 563978    |
| $\alpha$ -CXCR4                                      |              |                    |                           |
| $\alpha$ -CD62L                                      | 2B11         | PE-CF594           | BD Biosciences; 565019    |
|                                                      | MEL-14       | APC                | BD Biosciences; 561919    |
| <b>Human Macrophage Cell Panel</b>                   |              |                    |                           |
| <b>Antibody</b>                                      | <b>Clone</b> | <b>Fluorophore</b> | <b>Supplier and Cat #</b> |
| $\alpha$ -CD163                                      | GHI/61       | PerCP-Cy5.5        | BioLegend; 333607         |
| $\alpha$ -CD11b                                      |              |                    |                           |
| $\alpha$ -CD45                                       | ICRF44       | FITC               | BD Biosciences; 562793    |
| $\alpha$ -CD235                                      | HI30         | Alexa Fluor 700    | BD Biosciences; 560566    |
|                                                      | HIR2         | PE-Cy7             | BD Biosciences; 563666    |
| <b>Murine Transplants Panel</b>                      |              |                    |                           |
| <b>Antibody</b>                                      | <b>Clone</b> | <b>Fluorophore</b> | <b>Supplier and Cat #</b> |
| $\alpha$ -CD45.1                                     | A20          | PE                 | BD; 561872                |
| $\alpha$ -CD45.2                                     |              |                    |                           |
| $\alpha$ -CD3e                                       | 104          | FITC               | BD; 561874                |
| $\alpha$ -CD11b                                      | 145-2C11     | PerCP-Cy5.5        | BD; 561108                |
| $\alpha$ -B220                                       | M1/70        | APC-Cy7            | BD; 561039                |
|                                                      | RA3-6B2      | APC                | BD; 561880                |

| Co-Culture Phenotyping Panel |          |             |                        |
|------------------------------|----------|-------------|------------------------|
| Antibody                     | Clone    | Fluorophore | Supplier and Cat #     |
| Lineage                      |          |             |                        |
| α-Ter119                     | TER-119  | PerCP-Cy5.5 | BD Biosciences; 560512 |
| α-Gr1                        | RB6-8C5  |             | BD Biosciences; 561103 |
| α-B220                       | RA3-6B2  |             | BD Biosciences; 561101 |
| α-CD3e                       | 145-2C11 |             | BD Biosciences; 551163 |
| α-Sca1                       | D7       | PE-Cy7      | BD Biosciences; 558162 |
| α-c-Kit                      | 2B8      | PE-Cy5      | eBioscience; 15-1171   |
| α-CD41                       | MwReg30  | BUV-395     | BD Biosciences; 565980 |
|                              | 2C9.G2   |             |                        |
| α-CD61                       |          | AF647       | BD Biosciences; 563523 |

**Table S1. List of antibodies used in the flow cytometric and cell sorting analyses described.** These include panels for murine hematopoietic stem and progenitor cells, murine stromal cells, murine and human macrophages and the murine competitive transplant experiment.

Supplemental Table 2. Frisch, Hoffman *et al.*

| Cell Population         | Immunophenotype                     |
|-------------------------|-------------------------------------|
| LSK                     | Lin-/Sca1+/cKit+                    |
| LT-HSC                  | Lin-/Sca1+/cKit+/Flt3-/CD48-/CD150+ |
| ST-HSC                  | Lin-/Sca1+/cKit+/Flt3-/CD48-/CD150- |
| MPP2                    | Lin-/Sca1+/cKit+/Flt3-/CD48+/CD150+ |
| MPP3                    | Lin-/Sca1+/cKit+/Flt3-/CD48+/CD150- |
| MPP4                    | Lin-/Sca1+/cKit+/Flt3-/CD48+        |
| MP                      | Lin-/Sca1-/cKit+                    |
| CMP                     | Lin-/Sca1-/cKit+/CD34+/FcγR-        |
| GMP                     | Lin-/Sca1-/cKit+/CD34+/FcγR+        |
| MEP                     | Lin-/Sca1-/cKit+/CD34-/FcγR-        |
| MkP                     | Lin-/Sca1-/cKit+/CD41+/CD150+       |
| CLP                     | Lin-/CD127+/Flt3+                   |
| MSCs                    | Lin-/CD45-/CD31-/Sca1+/CD51+        |
| OBCs                    | Lin-/CD45-/CD31-/Sca1-/CD51+        |
| PαS+                    | Lin-/CD45-/CD31-/Sca1+/PDGFRα+      |
| PααV                    | Lin-/CD45-/CD31-/CD51+/PDGFRα+      |
| LepR                    | Lin-/CD45-/CD31-/LepR+              |
| Macrophage              | CD11b+/F4/80+/Ly6C-Lo               |
| Neutrophil              | CD11b+/F4/80-/Ly6C-Int              |
| Senescent<br>Neutrophil | Ly6G+/CXCR4-Hi/CD62L-Lo             |

**Table S2. List of cell populations analyzed and their respective immunophenotypes.**

| GO Term                                                 | Genes                                                                                                                                                                                                                                                  | Fold Enrichment | P-Value  | FDR      |
|---------------------------------------------------------|--------------------------------------------------------------------------------------------------------------------------------------------------------------------------------------------------------------------------------------------------------|-----------------|----------|----------|
| Inflammatory response                                   | PRKCZ, CCL3, TLR1, PPARG, CXCL2, TNFRSF8, NLRP1B, FPR2, CCL4, TLR8, IL10, TLR9, S1PR3, SLC11A1, CCL22, MYD88, SMPDL3B, CXCR6, TICAM1, PYCARD, IL1B, LTA, NFKBIZ, LYN, C4B, HCK, IL27, ACKR2, TNFRSF14, SMAD1, CD180, CHST1, CCR5, TRP73, THEMIS2, CD14 | 4.009115        | 6.09E-12 | 1.07E-08 |
| Immune system process                                   | CD244, LST1, CADM1, FGR, TLR1, PTPN22, TNFSF13, NLRP1B, GBP2B, TLR8, LGR4, TLR9, MYD88, SMPDL3B, SH2D1B1, TICAM1, OASL1, MAP3K8, PYCARD, CD8B1, LYN, CD3E, HCK, IL27, CD300E, H2-Q7, CD180, PRKCB, IFIT3, C1QB, IFIT1, LAT2, CD300LF, THEMIS2, CD14    | 3.500852        | 4.95E-10 | 8.69E-07 |
| Innate immune response                                  | CD244, FGR, TLR1, IGHG2C, JCHAIN, NLRP1B, IGHG2B, TRIM10, IGHM, TLR8, LGR4, TLR9, MYD88, SMPDL3B, SH2D1B1, PTK6, TICAM1, OASL1, PYCARD, FCER1G, IGKC, LYN, C4B, HCK, IL27, CD180, IFIT3, C1QB, IFIT1, IGLC2, SRMS, CD14                                | 3.064746        | 6.97E-08 | 1.22E-04 |
| Immune response                                         | CD244, CCL3, LST1, TLR1, CXCL2, TNFRSF8, TNFSF13, CCL4, FTH1, IL10, TLR9, CCL22, MYD88, OASL1, IGKV4-55, IL1B, LTA, FYB, GZMC, CTSS, TNFSF9, CCR8, CBLB, CCR6, CXCL14, CCR5, CD274, TGFB3, BMP1A, LCP2                                                 | 4.225293        | 1.36E-10 | 2.39E-07 |
| Positive regulation of tumor necrosis factor production | ZBTB20, CCL3, MYD88, CCR5, TICAM1, CD2, PYCARD, FCER1G, IL12B, CCL4, CD14, TLR9                                                                                                                                                                        | 7.791727        | 3.02E-07 | 5.30E-04 |
| B cell receptor signaling pathway                       | LAT2, LYN, BCL2, IGHG2C, IGHG2B, RFTN1, IGKC, IGLC2, IGHM, PRKCB                                                                                                                                                                                       | 6.965331        | 1.12E-05 | 0.019694 |
| Positive regulation of interferon-gamma production      | SLC11A1, IL27RA, CD3E, PYCARD, BCL3, IL1B, IL12B, TNFSF9, LTA, CD14                                                                                                                                                                                    | 7.367177        | 6.96E-06 | 0.012212 |
| Release of cytochrome c from mitochondria               | ATP7A, BCL2A1D, BCL2A1C, BCL2A1B, BCL2A1A, BCL2, PMAIP1, TRP73                                                                                                                                                                                         | 11.78748        | 3.33E-06 | 0.005849 |
| Immunoglobulin mediated immune response                 | MYD88, C4B, IGHG2C, FCER1G, TNFSF13, IGHG2B, IGHA, IGHM                                                                                                                                                                                                | 13.93066        | 9.45E-07 | 0.00166  |

**Table S3. List of top GO-Biological Process categories enriched for significantly upregulated genes from murine aged vs young marrow macrophages.**

| KEGG ID                                | Genes                                                                                                                                                            | Fold Enrichment | P-Value  | FDR      |
|----------------------------------------|------------------------------------------------------------------------------------------------------------------------------------------------------------------|-----------------|----------|----------|
| Cytokine-cytokine receptor interaction | CCL3, IL9R, IL21R, TNFRSF8, TNFSF13, TNFRSF14, TNFSF9, CCL4, IL10, KDR, CCR8, CCR6, CXCL14, CCR5, CLCF1, IL10RA, CXCR6, IL1B, IL12B, CSF2RA, LTA, IFNLR1, BMPR1A | 3.206791        | 2.35E-06 | 1.07E-08 |
| Toll-like receptor signaling pathway   | CCL3, TLR1, CCL4, TLR8, TLR9, IKBKE, MYD88, TICAM1, MAP3K8, IL1B, PIK3R5, IL12B, CD14                                                                            | 4.396741        | 3.38E-05 | 8.69E-07 |
| NF-kappa B signaling pathway           | TRAF1, LYN, CCL4, CARD11, BCL2A1D, MYD88, BCL2A1C, BCL2A1B, BCL2A1A, BCL2, TICAM1, GM11787, IL1B, CD14, LTA                                                      | 5.282365        | 6.97E-07 | 1.22E-04 |

**Table S4. List of significant KEGG Pathways enriched for significantly upregulated genes from murine aged vs young marrow macrophages.**
